# Supplementary material for: Comparative Genomics and Metabolomics Analyses of Clavulanic Acid-Producing Streptomyces Species Provides Insight Into Specialized Metabolism
Source: PubMed Central journal article supplement (PMC6856088; doi:10.3389/fmicb.2019.02550), 2019-11-08

**Supplementary Table S1.** Clavulanic acid (CA) and cephamicin C (Ceph-C) production in *S. clavuligerus* mutants with defects in genes from the clavulanic acid biosynthetic gene cluster. Phenotypes for some *S. clavuligerus* gene mutants that have homologues in clavulanic acid-like gene clusters of non-producers are also included.

| Gene                       | Product (function)                                      | Metabolite production <sup>a</sup> |                 | Reference <sup>b</sup>                                                                                            |
|----------------------------|---------------------------------------------------------|------------------------------------|-----------------|-------------------------------------------------------------------------------------------------------------------|
|                            |                                                         | Ceph-C                             | CA              |                                                                                                                   |
| <i>ceaS1/2<sup>c</sup></i> | Carboxyethylarginine synthase (biosynthesis)            | Yes                                | No              | (Pérez-Redondo et al., 1999)<br>(Jensen et al., 2000)<br>(Tahlan et al., 2004)                                    |
| <i>bls1/2<sup>c</sup></i>  | β-Lactam synthetase (biosynthesis)                      | Yes                                | No              | (Bachmann et al., 1998)<br>(Jensen et al., 2000)<br>(Tahlan et al., 2004)                                         |
| <i>pah1/<sup>c</sup></i>   | Proclavaminic acid amidinohydrolase (biosynthesis)      | Yes                                | No              | (Aidoo et al., 1994)<br>(Jensen et al., 2004b)                                                                    |
| <i>cas1/2<sup>c</sup></i>  | Clavaminic acid synthase (biosynthesis)                 | Yes                                | No              | (Mosher et al., 1999)<br>(Jensen et al., 2000)                                                                    |
| <i>oat1/2<sup>c</sup></i>  | Ornithine acetyltransferase                             | Yes                                | Yes             | (de la Fuente et al., 2004)<br>(Tahlan et al., 2004)                                                              |
| <i>oppA1</i>               | Oligopeptide transporter                                | Yes                                | No              | (Lorenzana et al., 2004)<br>(Jensen et al., 2000)<br>(Álvarez-Álvarez et al., 2018)                               |
| <i>claR</i>                | Transcriptional activator (regulation)                  | Yes                                | No              | (Paradkar et al., 1998)<br>(Pérez-Redondo et al., 1998)<br>(Jensen et al., 2000)<br>(Martínez-Burgo et al., 2015) |
| <i>car (cad)</i>           | Clavialdehyde reductase or dehydrogenase (biosynthesis) | Yes                                | No              | (Jensen et al., 2000)                                                                                             |
| <i>cyp (orf10)</i>         | Cytochrome P-450 (biosynthesis)                         | Yes                                | No              | (Jensen et al., 2000)<br>(Li et al., 2000)<br>(Mellado et al., 2002)                                              |
| <i>fd (orf11)</i>          | Ferredoxin                                              | Yes                                | 70-80% of wt    | (Jensen et al., 2004a)                                                                                            |
| <i>cpe (orf12)</i>         | β-Lactamase-like protein (biosynthesis)                 | Yes                                | No              | (Jensen et al., 2004a)<br>(Li et al., 2000)<br>(Valegård et al., 2013)<br>(Srivastava et al., 2019)               |
| <i>orf13</i>               | Membrane transport protein                              | Yes                                | No              | (Mellado et al., 2002)<br>(Jensen et al., 2004a)                                                                  |
| <i>cbg (orf14)</i>         | Acetyltransferase (biosynthesis)                        | Yes                                | No              | (Mellado et al., 2002)<br>(Jensen et al., 2004a)                                                                  |
| <i>oppA2 (orf15)</i>       | Oligopeptide transporter (biosynthesis)                 | Yes                                | No              | (Mellado et al., 2002)<br>(Jensen et al., 2004a)<br>(Lorenzana et al., 2004)<br>(Álvarez-Álvarez et al., 2018)    |
| <i>orf16</i>               | N-Acetyltransferase (biosynthesis)                      | Yes                                | No              | (Mellado et al., 2002)<br>(Jensen et al., 2004a)                                                                  |
| <i>gcas (orf17)</i>        | N-glycyl-clavaminic acid synthetase (biosynthesis)      | Yes                                | No              | (Mellado et al., 2002)<br>(Jensen et al., 2004a)<br>(Arulanantham et al., 2006)                                   |
| <i>pbpA (orf18)</i>        | Penicillin binding protein                              | NA <sup>d</sup>                    | NA <sup>d</sup> | (Mellado et al., 2002)<br>(Jensen et al., 2004a)                                                                  |

|                     |                                                      |           |           |                                                                    |
|---------------------|------------------------------------------------------|-----------|-----------|--------------------------------------------------------------------|
| <i>pbp2 (orf19)</i> | Penicillin binding protein                           | Yes       | Yes       | (Mellado et al., 2002)<br>(Jensen et al., 2004a)                   |
| <i>orf20</i>        | Cytochrome P-450                                     | Yes       | Yes       | (Jensen, 2012)<br>(Shrestha et al., 2017)                          |
| <i>orf21</i>        | RNA polymerase $\sigma$ factor (regulation)          | Yes       | Yes       | (Song et al., 2009)<br>(Jnawali et al., 2011)                      |
| <i>orf22</i>        | Two-component system histidine kinase (regulation)   | Yes       | Yes       | (Song et al., 2009)<br>(Fu et al., 2019)                           |
| <i>orf23</i>        | Two-component system response regulator (regulation) | 47% of wt | 40% of wt | (Jnawali et al., 2008)<br>(Song et al., 2009)<br>(Fu et al., 2019) |
| <i>ccaR</i>         | Transcriptional activator (regulation)               | No        | No        | (Alexander and Jensen, 1998)                                       |
| <i>pcbR</i>         | Penicillin binding protein (resistance)              | Yes       | Yes       | (Paradkar et al., 1996)                                            |
| <i>orf11</i>        | Unknown                                              | Yes       | Yes       | (Alexander and Jensen, 1998)                                       |
| <i>nocE</i>         | Lipases/esterases                                    | Yes       | Yes       | <b>This study</b>                                                  |

<sup>a</sup> >95% level of production when compared to wild type *S. clavuligerus* is reported as “Yes” and <5% production is reported as “No”

<sup>b</sup> References:

- Aidoo, K.A., Wong, A., Alexander, D.C., Rittammer, R.A., and Jensen, S.E. (1994). Cloning, sequencing and disruption of a gene from *Streptomyces clavuligerus* involved in clavulanic acid biosynthesis. *Gene* 147(1), 41-46. doi: 10.1016/0378-1119(94)90036-1.
- Alexander, D.C., and Jensen, S.E. (1998). Investigation of the *Streptomyces clavuligerus* cephamycin C gene cluster and its regulation by the CcaR protein. *J Bacteriol* 180(16), 4068-4079.
- Álvarez-Álvarez, R., Rodríguez-García, A., Martínez-Burgo, Y., Martín, J.F., and Liras, P. (2018). Transcriptional Studies on a *Streptomyces clavuligerus* oppA2 Deletion Mutant: N-Acetylglycyl-Clavaminic Acid Is an Intermediate of Clavulanic Acid Biosynthesis. *Appl Environ Microbiol* 84(22). doi: 10.1128/AEM.01701-18.
- Arulanantham, H., Kershaw, N.J., Hewitson, K.S., Hughes, C.E., Thirkettle, J.E., and Schofield, C.J. (2006). ORF17 from the clavulanic acid biosynthesis gene cluster catalyzes the ATP-dependent formation of N-glycyl-clavaminic acid. *J Biol Chem* 281(1), 279-287. doi: 10.1074/jbc.M507711200.
- Bachmann, B.O., Li, R., and Townsend, C.A. (1998). beta-Lactam synthetase: a new biosynthetic enzyme. *Proc Natl Acad Sci U S A* 95(16), 9082-9086. doi: 10.1073/pnas.95.16.9082.
- de la Fuente, A., Martín, J.F., Rodríguez-García, A., and Liras, P. (2004). Two proteins with ornithine acetyltransferase activity show different functions in *Streptomyces clavuligerus*: Oat2 modulates clavulanic acid biosynthesis in response to arginine. *J Bacteriol* 186(19), 6501-6507. doi: 10.1128/JB.186.19.6501-6507.2004.
- Fu, J., Qin, R., Zong, G., Liu, C., Kang, N., Zhong, C., et al. (2019). The CagRS Two-Component System Regulates Clavulanic Acid Metabolism via Multiple Pathways in *Streptomyces clavuligerus* F613-1. *Front Microbiol* 10, 244. doi: 10.3389/fmicb.2019.00244.
- Jensen, S.E. (2012). Biosynthesis of clavam metabolites. *J Ind Microbiol Biotechnol* 39(10), 1407-1419. doi: 10.1007/s10295-012-1191-0.
- Jensen, S.E., Elder, K.J., Aidoo, K.A., and Paradkar, A.S. (2000). Enzymes catalyzing the early steps of clavulanic acid biosynthesis are encoded by two sets of paralogous genes in *Streptomyces clavuligerus*. *Antimicrob Agents Chemother* 44(3), 720-726. doi: 10.1128/aac.44.3.720-726.2000.
- Jensen, S.E., Paradkar, A.S., Mosher, R.H., Anders, C., Beatty, P.H., Brumlik, M.J., et al. (2004a). Five additional genes are involved in clavulanic acid biosynthesis in *Streptomyces clavuligerus*. *Antimicrob Agents Chemother* 48(1), 192-202. doi: 10.1128/aac.48.1.192-202.2004.
- Jensen, S.E., Wong, A., Griffin, A., and Barton, B. (2004b). *Streptomyces clavuligerus* has a second copy of the proclavaminic amidinohydrolase gene. *Antimicrob Agents Chemother* 48(2), 514-520. doi: 10.1128/aac.48.2.514-520.2004.

- Jnawali, H.N., Liou, K., and Sohng, J.K. (2011). Role of sigma-factor (*orf21*) in clavulanic acid production in *Streptomyces clavuligerus* NRRL3585. *Microbiol Res* 166(5), 369-379. doi: 10.1016/j.micres.2010.07.005.
- Jnawali, H.N., Oh, T.J., Liou, K., Park, B.C., and Sohng, J.K. (2008). A two-component regulatory system involved in clavulanic acid production. *J Antibiot (Tokyo)* 61(11), 651-659. doi: 10.1038/ja.2008.92.
- Li, R., Khaleeli, N., and Townsend, C.A. (2000). Expansion of the clavulanic acid gene cluster: identification and *in vivo* functional analysis of three new genes required for biosynthesis of clavulanic acid by *Streptomyces clavuligerus*. *J Bacteriol* 182(14), 4087-4095. doi: 10.1128/jb.182.14.4087-4095.2000.
- Lorenzana, L.M., Pérez-Redondo, R., Santamarta, I., Martín, J.F., and Liras, P. (2004). Two oligopeptide-permease-encoding genes in the clavulanic acid cluster of *Streptomyces clavuligerus* are essential for production of the beta-lactamase inhibitor. *J Bacteriol* 186(11), 3431-3438. doi: 10.1128/JB.186.11.3431-3438.2004.
- Martínez-Burgo, Y., Álvarez-Álvarez, R., Rodríguez-García, A., and Liras, P. (2015). The Pathway-Specific Regulator ClaR of *Streptomyces clavuligerus* Has a Global Effect on the Expression of Genes for Secondary Metabolism and Differentiation. *Appl Environ Microbiol* 81(19), 6637-6648. doi: 10.1128/AEM.00916-15.
- Mellado, E., Lorenzana, L.M., Rodríguez-Sáiz, M., Díez, B., Liras, P., and Barredo, J.L. (2002). The clavulanic acid biosynthetic cluster of *Streptomyces clavuligerus*: genetic organization of the region upstream of the *car* gene. *Microbiology* 148(Pt 5), 1427-1438. doi: 10.1099/00221287-148-5-1427.
- Mosher, R.H., Paradkar, A.S., Anders, C., Barton, B., and Jensen, S.E. (1999). Genes specific for the biosynthesis of clavam metabolites antipodal to clavulanic acid are clustered with the gene for clavamate synthase 1 in *Streptomyces clavuligerus*. *Antimicrob Agents Chemother* 43(5), 1215-1224.
- Paradkar, A.S., Aidoo, K.A., and Jensen, S.E. (1998). A pathway-specific transcriptional activator regulates late steps of clavulanic acid biosynthesis in *Streptomyces clavuligerus*. *Mol Microbiol* 27(4), 831-843. doi: 10.1046/j.1365-2958.1998.00731.x.
- Paradkar, A.S., Aidoo, K.A., Wong, A., and Jensen, S.E. (1996). Molecular analysis of a beta-lactam resistance gene encoded within the cephamycin gene cluster of *Streptomyces clavuligerus*. *J Bacteriol* 178(21), 6266-6274. doi: 10.1128/jb.178.21.6266-6274.1996.
- Pérez-Redondo, R., Rodríguez-García, A., Martín, J.F., and Liras, P. (1998). The *claR* gene of *Streptomyces clavuligerus*, encoding a LysR-type regulatory protein controlling clavulanic acid biosynthesis, is linked to the clavulanate-9-aldehyde reductase (*car*) gene. *Gene* 211(2):311-21. doi: 10.1016/s0378-1119(98)00106-1.
- Pérez-Redondo, R., Rodríguez-García, A., Martín, J.F., and Liras, P. (1999). Deletion of the *pyc* gene blocks clavulanic acid biosynthesis except in glycerol-containing medium: evidence for two different genes in formation of the C3 unit. *J Bacteriol* 181(22), 6922-6928.
- Song, J.Y., Kim, E.S., Kim, D.W., Jensen, S.E., and Lee, K.J. (2009). A gene located downstream of the clavulanic acid gene cluster in *Streptomyces clavuligerus* ATCC 27064 encodes a putative response regulator that affects clavulanic acid production. *J Ind Microbiol Biotechnol* 36(2), 301-311. doi: 10.1007/s10295-008-0499-2.
- Shrestha, B., Darsandhari, S., Kim, T.S., and Sohng, J.K. (2017). Investigating the Role of CYP 450 (*orf20*) Involved in Clavulanic acid Biosynthetic Pathway in *Streptomyces clavuligerus* NRRL 3585. *18<sup>th</sup> International Symposium on the Biology of Actinomycetes*, At ICC JEJU, KOREA.
- Srivastava, S.K., King, K.S., AbuSara, N.F., Malayny, C.J., Piercey, B.M., Wilson, J.A., et al. (2019). *In vivo* functional analysis of a class A beta-lactamase-related protein essential for clavulanic acid biosynthesis in *Streptomyces clavuligerus*. *PLoS One* 14(4), e0215960. doi: 10.1371/journal.pone.0215960.
- Tahlan, K., Park, H.U., Wong, A., Beatty, P.H., and Jensen, S.E. (2004). Two sets of paralogous genes encode the enzymes involved in the early stages of clavulanic acid and clavam metabolite biosynthesis in *Streptomyces clavuligerus*. *Antimicrob Agents Chemother* 48(3), 930-939. doi: 10.1128/aac.48.3.930-939.2004.
- Valegård, K., Iqbal, A., Kershaw, N.J., Ivison, D., Génèreux, C., Dubus, A., et al. (2013). Structural and mechanistic studies of the *orf12* gene product from the clavulanic acid biosynthesis pathway. *Acta Crystallogr D Biol Crystallogr* 69(Pt 8), 1567-1579. doi: 10.1107/S0907444913011013.

<sup>c</sup> There are two copies each of these genes in the clavulanic acid, clavam and/or paralogue gene clusters of *S. clavuligerus*, and phenotypes of double disruption mutants are reported

<sup>d</sup> NA: not applicable. Mutants could not be obtained and the gene was proposed to be essential for survival in *S. clavuligerus*

**Supplementary Table S2.** Sequences of oligonucleotide primers used in the current study and their details.

| Name                             | Sequence (5' – 3')                                       | Product size | Description                                                                                                                                               |
|----------------------------------|----------------------------------------------------------|--------------|-----------------------------------------------------------------------------------------------------------------------------------------------------------|
| nocE-KO-UP-F2<br>nocE-KO-UP-R2   | AAGCTTCCCTGGCTGAAACCCTATGG<br>GAATTCGCGCTTGGATCTGCTCAAAG | 1224 bp      | Primers for amplification of the upstream region of <i>nocE</i> from <i>S. clavuligerus</i> to prepare pIJ12738- <i>nocE</i> -UP-DN                       |
| nocE-KO-DN-F<br>nocE-KO-DN-R2    | GAATTCCTGCCGTGATGAAGTCCTT<br>TCTAGACACCAAGGCGATCCTCTACC  | 1221 bp      | Primers for amplification of the downstream region of <i>nocE</i> from <i>S. clavuligerus</i> to prepare pIJ12738- <i>nocE</i> -UP-DN                     |
| nocE-KO-UP-F2<br>nocE-KO-DN-R2   | AAGCTTCCCTGGCTGAAACCCTATGG<br>TCTAGACACCAAGGCGATCCTCTACC | 2445 bp      | Primers for confirming upstream and downstream regions of <i>nocE</i> in <i>S. clavuligerus</i> pIJ12738- <i>nocE</i> -UP-DN                              |
| Sc-nocE-F2<br>Sc-nocE-R1         | GTCGAGAAGCTCCCGTACCA<br>CGGTAGCCGTGGACCATCTT             | 1787 bp      | Primers for detection of <i>nocE</i> in <i>S. clavuligerus</i> pIJ12738- <i>nocE</i> -UP-DN                                                               |
| nocE-UPDN-ID-F<br>nocE-UPDN-ID-R | GTCTGAACCACTTTCGCAGC<br>GTGAAAGTGGCATGGCGAATC            | 439 bp       | Primers for confirming the presence of upstream and downstream regions of <i>nocE</i> in <i>S. clavuligerus</i> $\Delta$ <i>nocE</i>                      |
| Sc-nocE-F1<br>nocE-ID-R          | GCCGACGAGAAGGACGGTTA<br>CAGCTTGTTGGTGAAGGTGC             | 156 bp       | Primers for confirming deletion of <i>nocE</i> in <i>S. clavuligerus</i> $\Delta$ <i>nocE</i>                                                             |
| nocE-KN-F<br>nocE-KN-R           | CATATGGAATTTCCCGGACTCC<br>GAATTCACCTCACCACCGGTGAGATA     | 1088 bp      | Primers for amplification of the 5' end of <i>nocE</i> from <i>S. clavuligerus</i> to prepare pIJ8668- <i>ermEp*</i> - <i>nocE</i>                        |
| ermEp-F<br>nocE-K-R              | GATATCGGTACCAGCCCGAC<br>GCGCTTGGATCTGCTCAAAG             | 578 bp       | Primers for confirming the insertion of <i>ermEp*</i> in <i>S. clavuligerus</i> <i>ermEp*</i> - <i>nocE</i>                                               |
| Sc-nocE-F1<br>nocE-ID-R          | GCCGACGAGAAGGACGGTTA<br>CAGCTTGTTGGTGAAGGTGC             | 156 bp       | Primers for RT-PCR of <i>nocE</i> from <i>S. clavuligerus</i>                                                                                             |
| cas2-O73<br>cas2-O74             | GCAAGCGGCTGGTATGG<br>GGTCTCCGAGGACAGGTAGTGC              | 143 bp       | Primers for RT-PCR of <i>cas2</i> from <i>S. clavuligerus</i>                                                                                             |
| ceaS2-F<br>ceaS2-R               | ATCGACTTCGTTCTGACCCG<br>GGTGTGCTTCGGGAAGATGT             | 213 bp       | Primers for RT-PCR of <i>ceaS2</i> from <i>S. clavuligerus</i>                                                                                            |
| hrdB-4F<br>hrdB-4R               | CGCGGCATGCTCTTCT<br>AGGTGGCGTACGTGGAGAAC                 | 109 bp       | Primers for RT-PCR of <i>hrdB</i> from <i>S. clavuligerus</i>                                                                                             |
| Sj-pcbC-cmch-F<br>Sj-pcbC-cmch-R | AACTGCGGTACGTACATGGG<br>CCACATCGACTGGAACGTGT             | 1089 bp      | Primers for PCR amplification and sequencing of the <i>pcbC-cmch</i> regions from the Ceph-C BGCs of <i>S. jumonjinensis</i> and <i>S. katsurahamanus</i> |

|                                  |                                              |         |                                                                                                                                                           |
|----------------------------------|----------------------------------------------|---------|-----------------------------------------------------------------------------------------------------------------------------------------------------------|
| Sj-or11-lat-F<br>Sj-or11-lat-R   | ACCACGACGACATGGTCAC<br>GTACCTGAACTGGCGGGAAT  | 1904 bp | Primers for PCR amplification and sequencing of the <i>orf11-lat</i> regions from the Ceph-C BGCs of <i>S. jumonjinensis</i> and <i>S. katsurahamanus</i> |
| Sj-pcbR-ccaR-F<br>Sj-pcbR-ccaR-R | CTGGATGATCGGCTACCAGG<br>GAAGCGAGAAATCGCCGTTG | 685 bp  | Primers for PCR amplification and sequencing of the <i>pcbR-ccaR</i> regions from the Ceph-C BGCs of <i>S. jumonjinensis</i> and <i>S. katsurahamanus</i> |
| Sj-lat-pcbAB-F<br>Sj-lat-pcbAB-R | GAGGCAACCTCGCCGATATG<br>TCCCTGAGCGTGGTGTAGT  | 705 bp  | Primers for PCR amplification and sequencing of the <i>lat-pcbAB</i> regions from the Ceph-C BGCs of <i>S. jumonjinensis</i> and <i>S. katsurahamanus</i> |
| Sk-pcb74-bla-F<br>Sk-pcb74-bla-R | CAAGAAGGGCCAGTTCTCG<br>CAATCTGCTGATGCGCGAC   | 917 bp  | Primers for PCR amplification and sequencing of the <i>pcb74-bla</i> regions from the Ceph-C BGCs of <i>S. jumonjinensis</i> and <i>S. katsurahamanus</i> |
| Sj-cmcl-cefE-F<br>Sj-cmcl-cefE-R | GTGGTAAGCCGGGTCTTCTC<br>GCTCCTCTCATAACCGGTGG | 996 bp  | Primers for PCR amplification and sequencing of the <i>cmcl-cefE</i> region from the Ceph-C BGC of <i>S. jumonjinensis</i>                                |
| Sk-cmcl-cefE-F<br>SK-cmcl-cefE-R | GCCGATCTGGACAGTACGTT<br>ATACGGCCGAAATACTGCGT | 1070 bp | Primers for PCR amplification and sequencing of the <i>cmcl-cefE</i> region from the Ceph-C BGC of <i>S. katsurahamanus</i>                               |
| pcbAB-Sj-F<br>pcbAB-Sj-R         | CTGGAACAGCAGCGGCAA<br>AGGTGTCCTCCAGCATGAAC   | 1773 bp | Primers for PCR amplification and sequencing of <i>pcbAB</i> from the Ceph-C BGC of <i>S. jumonjinensis</i>                                               |
| pcbAB-Sk-F<br>pcbAB-Sk-R         | CCGTCAACACGATGAACAGC<br>AGTTGGAGAACGACAGCAGG | 1023 bp | Primers for PCR amplification and sequencing of <i>pcbAB</i> from the Ceph-C BGC of <i>S. katsurahamanus</i>                                              |

**Supplementary Table S3.** Details of genome sequence assemblies for *S. jumonjinensis* and *S. katsurahamanus* from the current study.

| Property/Attribute                          | <i>S. jumonjinensis</i> | <i>S. katsurahamanus</i> |
|---------------------------------------------|-------------------------|--------------------------|
| Assembly length (bp)                        | 8465075                 | 7243866                  |
| Coverage after assembly (fold) <sup>a</sup> | 46                      | 31                       |
| GC content (ratio)                          | 0.71                    | 0.71                     |
| Total number of contigs                     | 209                     | 411                      |
| N50                                         | 91474                   | 37935                    |
| L50                                         | 28                      | 51                       |
| Largest contig                              | 385731                  | 204440                   |
| Genome completeness (BUSCO %) <sup>b</sup>  | 98                      | 98                       |

<sup>a</sup> Indicates actual fold coverage based on estimated genome size.

<sup>b</sup> Calculated using the Benchmarking Universal Single-Copy Orthologs (BUSCO) software (Simao et al., 2015).

#### References:

- Simao, F.A., Waterhouse, R.M., Ioannidis, P., Kriventseva, E.V., and Zdobnov, E.M. (2015). BUSCO: assessing genome assembly and annotation completeness with single-copy orthologs. *Bioinformatics* 31(19), 3210-3212. doi: 10.1093/bioinformatics/btv351.

**Supplementary Table S4.** Known/predicted specialized metabolite (SM) biosynthetic gene clusters (BGCs) in *S. clavuligerus* (*Sc*), *S. jumonjinensis* (*Sj*), *S. katsurahamanus* (*Sk*) and *S. pratensis* (*Sp*) as determined using antiSMASH.

| SM type                 | BGC <sup>a</sup>                                                     | Function of product      | BGC in respective species (% similarity) <sup>a,b</sup> |                 |            |           | MIBiG BGC-ID <sup>d</sup> |
|-------------------------|----------------------------------------------------------------------|--------------------------|---------------------------------------------------------|-----------------|------------|-----------|---------------------------|
|                         |                                                                      |                          | <i>Sc</i> <sup>c</sup>                                  | <i>Sj</i>       | <i>Sk</i>  | <i>Sp</i> |                           |
| <b>β-lactam</b>         | Alanylclavam                                                         | Antifungal               | 100 (SM Cp13)                                           | NP <sup>e</sup> | NP         | NP        | BGC0000841                |
|                         | Carbapenem MM4550                                                    | Antibiotic               | NP                                                      | NP              | NP         | 65        | BGC0000842                |
|                         | 5S Clavams                                                           | Antifungal               | 81 (SM C9)                                              | NP              | NP         | NP        | BGC0000843                |
|                         | <b>Clavulanic acid</b>                                               | β-lactamase inhibitor    | <b>75 (SM C10)</b>                                      | 70              | <b>70</b>  | 20        | BGC0000845                |
| <b>Butyrolactone</b>    | Butyrolactone-like BGC ( <i>Sj</i> , cluster 9)                      | Unknown                  | NP                                                      | 100             | NP         | NP        | NA <sup>f</sup>           |
|                         | Butyrolactone-like BGC ( <i>Sc</i> , pSCL4 <sup>g</sup> , cluster 8) |                          | 100 (SCLAV_p0810 - 0816)                                | NP              | NP         | NP        | NA                        |
|                         | Butyrolactone-like BGC ( <i>Sp</i> , cluster 27)                     |                          | NP                                                      | NP              | NP         | 100       | NA                        |
| <b>Ectoine</b>          | <b>Ectoine</b>                                                       | Osmolyte                 | <b>100 (SCLAV_1073 – 1083)</b>                          | <b>100</b>      | <b>100</b> | 100       | BGC0000853                |
| <b>Indole</b>           | Staurosporine                                                        | Antifungal/antitumor     | NP                                                      | 93              | NP         | NP        | BGC0000825                |
|                         |                                                                      |                          | 94 (SM Cp14)                                            | NP              | NP         | NP        | BGC0000826                |
| <b>Melanin</b>          | Melanin                                                              | Protective pigment       | 100 (SCLAV_3894 – 3903)                                 | 100             | 100        | 100       | BGC0000911                |
| <b>NRPS<sup>h</sup></b> | A-503083                                                             | Antibiotic               | NP                                                      | 3               | NP         | NP        | BGC0000288                |
|                         | Chloroeremomycin                                                     | Antibiotic               | NP                                                      | NP              | 33         | NP        | BGC0000322                |
|                         | Coelichelin                                                          | Siderophore (peptide)    | NP                                                      | NP              | NP         | 90        | BGC0000325                |
|                         | Daptomycin                                                           | Antibiotic (lipopeptide) | 12 (SM C5, SM Cp10 and SM Cp11)                         | 9               | 9          | NP        | BGC0000336                |
|                         | Feglymycin                                                           | Antibiotic/antiviral     | NP                                                      | 100             | 47         | NP        | BGC0001233                |
|                         | <b>Holomycin</b>                                                     | Antibiotic/antitumor     | <b>100 (SM C18)</b>                                     | NP              | NP         | NP        | BGC0000373                |

|                                        |                                         |                                       |                             |     |     |    |            |
|----------------------------------------|-----------------------------------------|---------------------------------------|-----------------------------|-----|-----|----|------------|
| NRPS <sup>h</sup>                      | Indigoidine                             | Antioxidant/antimicrobial             | 40<br>(SMCp24)              | NP  | NP  | NP | BGC0000375 |
|                                        | Leinamycin                              | Antimicrobial/antitumor               | NP                          | 2   | NP  | NP | BGC0001101 |
|                                        | Maduropeptin                            | Antitumor                             | NP                          | 15  | NP  | NP | BGC0001008 |
|                                        | Marformycins                            | Anti-infective                        | NP                          | NP  | NP  | 12 | BGC0001214 |
|                                        | Nanchangmycin                           | Antibiotic                            | 30<br>(SMC13)               | NP  | NP  | NP | BGC0000105 |
|                                        | Nucleocidin                             | Antibiotic/anti-trypanosome           | 47<br>(SMC19)               | NP  | NP  | NP | BGC0001387 |
|                                        | Pristinamycin                           | Antibiotic                            | NP                          | NP  | 17  | NP | BGC0000952 |
|                                        | Ristocetin                              | Antibiotic                            | NP                          | 10  | NP  | NP | BGC0000418 |
|                                        | Skyllamycin                             | Antitumor                             | NP                          | 14  | NP  | NP | BGC0000429 |
|                                        | SW-163                                  | Antitumor                             | NP                          | NP  | 7   | NP | BGC0000434 |
|                                        | UK-68,597                               | Antibiotic                            | NP                          | 17  | NP  | NP | BGC0001178 |
|                                        | NRPs-like BGC ( <i>Sk</i> , cluster23)  | Unknown                               | NP                          | NP  | 100 | NP | NA         |
|                                        | NRPs-like BGC ( <i>Sk</i> , cluster 30) |                                       | NP                          | NP  | 100 | NP | NA         |
| NRPs-like BGC ( <i>Sc</i> , cluster 6) | 100<br>(SMC7)                           |                                       | NP                          | NP  | NP  | NA |            |
| NRPS/PKS <sup>i</sup>                  | Cyclindrospermopsin                     | Cyanotoxin                            | NP                          | 66  | 14  | NP | BGC0000979 |
|                                        | Didemnins                               | Antiviral/immunosuppressant           | NP                          | 18  | NP  | NP | BGC0000985 |
|                                        | Lidamycin                               | Antibiotic/antitumor                  | NP                          | 34  | 34  | NP | BGC0001397 |
|                                        | Guadinomine                             | Antibiotic                            | 7<br>(SMCp6)                | NP  | NP  | NP | BGC0000998 |
|                                        | Kosinostatin                            | Antibiotic/antitumor                  | NP                          | 13  | NP  | NP | BGC0001073 |
|                                        | Lankacidin                              | Antibiotic/antitumor                  | NP                          | 20  | NP  | NP | BGC0001100 |
|                                        | Rapamycin                               | Immunosuppressant                     | 7<br>(SMCp22 and<br>SMCp23) | NP  | NP  | NP | BGC0001040 |
|                                        | Sporolide                               | Antiviral                             | 34<br>(SMCp17 to<br>SMCp21) | NP  | NP  | NP | BGC0000150 |
|                                        | Zorbamycin                              | Antibiotic/antitumor                  | NP                          | 4   | 4   | 6  | BGC0001058 |
| NRPS/T1PKS <sup>j</sup>                | Eponemycin                              | Angiogenesis inhibitor<br>/antibiotic | NP                          | NP  | 14  | NP | BGC0000345 |
|                                        | Rifamycin                               | Antibiotic (anti-mycobacterial)       | NP                          | 5   | NP  | NP | BGC0000137 |
|                                        | SGR PTMs                                | Antimicrobial/antioxidant             | NP                          | 100 | 100 | NP | BGC0001043 |



|                                 |                                                                       |                                |                                  |     |    |     |                   |
|---------------------------------|-----------------------------------------------------------------------|--------------------------------|----------------------------------|-----|----|-----|-------------------|
| Nucleoside                      | A201A                                                                 | Antibiotic                     | 15<br>(SMC14)                    | NP  | NP | NP  | BGC0000873        |
|                                 | A-503083                                                              | Antibiotic                     | NP                               | 3   | NP | NP  | BGC0000288        |
|                                 | <b>Tunicamycin</b>                                                    | Antibiotic                     | <b>92</b><br>(SCLAV_4276 – 4295) | NP  | NP | NP  | BGC0000880        |
| Other                           | ( <i>Sj</i> , Cluster 4)                                              | Unknown                        | NP                               | 100 | NP | NP  | NA                |
| PKS                             | Cinerubin B                                                           | Unknown                        | NP                               | NP  | NP | 31  | BGC0000212        |
|                                 | Granaticin                                                            | Antibiotic                     | NP                               | NP  | 8  | NP  | BGC0000227        |
|                                 | PM100117/PM100118                                                     | Antitumor                      | NP                               | NP  | 8  | NP  | BGC0001359_c<br>2 |
|                                 | RK-682                                                                | Tyrosine phosphatase inhibitor | NP                               | 54  | 54 | NP  | BGC0000140        |
|                                 | Steffimycin                                                           | Antitumor                      | NP                               | NP  | NP | 19  | BGC0000273        |
|                                 | Tautomycin                                                            | Phosphatase inhibitor          | NP                               | 6   | NP | NP  | BGC0000159        |
|                                 | Tetronasin                                                            | Antibiotic                     | NP                               | NP  | NP | 11  | BGC0000163        |
|                                 | Vicenistatin                                                          | Antibiotic                     | NP                               | NP  | NP | 60  | BGC0000167        |
|                                 | Viguiepinol                                                           | Antispasmodic                  | NP                               | NP  | 26 | NP  | BGC0000286        |
| RiPP <sup>k</sup> (Bacteriocin) | Bacteriocin-like BGC ( <i>Sj</i> , cluster 25; <i>Sk</i> , cluster25) | Unknown                        | NP                               | 100 | 80 | NP  | NA                |
|                                 | Bacteriocin-like BGC ( <i>Sc</i> , cluster 17)                        |                                | 100<br>(SCLAV_4854 – 4865)       | NP  | NP | NP  | NA                |
|                                 | Bacteriocin-like BGC ( <i>Sc</i> , pSCL4 cluster 12)                  |                                | 100<br>(SCLAV_p1129 – 1136)      | NP  | NP | NP  | NA                |
|                                 | Bacteriocin-like BGC ( <i>Sp</i> , cluster 4)                         |                                | NP                               | NP  | NP | 100 | NA                |
|                                 | Bacteriocin-like BGC ( <i>Sp</i> , cluster 8)                         |                                | NP                               | NP  | NP | 100 | NA                |
|                                 | Bacteriocin-like BGC ( <i>Sp</i> , cluster 12)                        |                                | NP                               | NP  | NP | 100 | NA                |
|                                 | Bacteriocin-like BGC ( <i>Sp</i> , cluster 22)                        |                                | NP                               | NP  | NP | 100 | NA                |
| RiPP (Lantipeptide)             | AmfS                                                                  | Morphogen                      | 80<br>(SCLAV_4943 – 4973)        | 80  | 80 | NP  | BGC0000496        |
|                                 | BD-12                                                                 | Antibiotic                     | 7<br>(SMC12)                     | 14  | NP | NP  | BGC0001379        |
|                                 | Thioviridamide                                                        | Immunomodulator                | NP                               | 10  | NP | NP  | BGC0000625        |
|                                 | Venezuelin                                                            | Unknown                        | 75<br>(SMCp7)                    | NP  | NP | NP  | BGC0000563        |

|                                                 |                                                                         |                                      |                                |            |           |     |            |
|-------------------------------------------------|-------------------------------------------------------------------------|--------------------------------------|--------------------------------|------------|-----------|-----|------------|
| <b>RiPP<br/>(Lasso peptide)</b>                 | Lantipeptide-like BGC ( <i>Sk</i> , cluster19)                          | Unknown                              | NP                             | NP         | 100       | NP  | NA         |
|                                                 | Lantipeptide-like BGC ( <i>Sc</i> , cluster 8)                          |                                      | 100<br>(SMC8)                  | NP         | NP        | NP  | NA         |
|                                                 | Lantipeptide-like BGC ( <i>Sp</i> , cluster16)                          | Unknown                              | NP                             | NP         | NP        | 100 | NA         |
|                                                 | SSV-2083                                                                | Unknown                              | NP                             | NP         | 50        | NP  | BGC0000579 |
|                                                 | Streptomycin                                                            | Antibiotic                           | NP                             | 2          | NP        | NP  | BGC0000717 |
|                                                 | Lasso peptide-like BGC ( <i>Sk</i> , cluster 12)                        | Unknown                              | NP                             | NP         | 100       | NP  | NA         |
|                                                 | Lasso peptide-like BGC ( <i>Sc</i> , pSCL4 cluster 3)                   |                                      | 100<br>(SCLAV_p0400 –<br>0421) | NP         | NP        | NP  | NA         |
| <b>RiPP (Linaridin)</b>                         | Legonaridin                                                             | Unknown                              | NP                             | 33         | 33        | NP  | BGC0001188 |
| <b>Saccharides</b>                              | Istamycin                                                               | Antibiotic                           | NP                             | NP         | NP        | 11  | BGC000700  |
|                                                 | Kanamycin                                                               | Antibiotic                           | NP                             | 8          | NP        | NP  | BGC0000703 |
|                                                 | Paromomycin                                                             | Antibiotic                           | 5<br>(SMC16)                   | NP         | NP        | NP  | BGC0000712 |
|                                                 | Streptomycin                                                            | Antibiotic                           | NP                             | 2          | 13        | NP  | BGC0000717 |
| <b>Siderophore</b>                              | <b>Desferrioxamine B</b>                                                | Siderophore                          | NP                             | NP         | NP        | 83  | BGC0000940 |
|                                                 |                                                                         |                                      | <b>100<br/>(SMC6)</b>          | <b>100</b> | <b>80</b> | NP  | BGC0000941 |
|                                                 | Siderophore-like BGCs ( <i>Sj</i> , cluster 3; <i>Sk</i> , cluster 15)  | Unknown                              | NP                             | 100        | 97        | NP  | NA         |
|                                                 | Siderophore-like BGCs ( <i>Sj</i> , cluster 26; <i>Sc</i> , cluster 15) |                                      | 78<br>(SCLAV_4677 –<br>4683)   | 100        | NP        | NP  | NA         |
|                                                 | Siderophore-like BGCs ( <i>Sj</i> , cluster 48)                         |                                      | NP                             | 100        | NP        | NP  | NA         |
|                                                 | Siderophore-like BGCs ( <i>Sk</i> , cluster 27; <i>Sp</i> , cluster 10) |                                      | NP                             | NP         | 100       | 72  | NA         |
| Siderophore-like BGCs ( <i>Sc</i> , cluster 26) | 100<br>(SMC23)                                                          |                                      | NP                             | NP         | NP        | NA  |            |
| <b>Terpene</b>                                  | Borrelidin                                                              | Angiogenesis inhibitor/antimicrobial | NP                             | 4          | 4         | NP  | BGC0000031 |
|                                                 | (-)-delta-cadinene                                                      | Unknown                              | 100<br>(SMCp2 and<br>SMCp3)    | NP         | NP        | NP  | BGC0000674 |
|                                                 | Hopene                                                                  | Membrane stability                   | 69<br>(SMC17)                  | 47         | 61        | 69  | BGC0000663 |
|                                                 | Isorenieratene                                                          | Carotenoid pigment                   | NP                             | NP         | NP        | 100 | BGC0000664 |

|                    |                                                                    |                                      |                            |                |     |     |            |
|--------------------|--------------------------------------------------------------------|--------------------------------------|----------------------------|----------------|-----|-----|------------|
| Terpene            | Naringenin                                                         | Antimicrobial/antioxidant/anti tumor | 100<br>(SCLAV_5491 – 5492) | 100            | 100 | NP  | BGC0001310 |
|                    | Pactamycin                                                         | Antimicrobial/antimalarial           | NP                         | NP             | 9   | NP  | BGC0000119 |
|                    | Pentalenolactone                                                   | Antibiotic                           | NP                         | 35             | NP  | NP  | BGC0000653 |
|                    | (+)-T-muurolol                                                     | Antifungal                           | 80<br>(SMCp1)              | NP             | NP  | NP  | BGC0000675 |
|                    | Terpene-like BGC ( <i>Sj</i> , cluster 19; <i>Sk</i> , cluster 28) | Unknown                              | NP                         | 100            | 97  | NP  | NA         |
|                    | Terpene-like BGC ( <i>Sj</i> , Cluster 45)                         | Unknown                              | NP                         | 100            | NP  | NP  | NA         |
|                    | Terpene-like BGC ( <i>Sc</i> , cluster 2)                          |                                      | 100<br>(SMC4)              | NP             | NP  | NP  | NA         |
|                    | Terpene-like BGC ( <i>Sc</i> , pSCL4 cluster 4)                    |                                      | 100<br>(SMCp4)             | NP             | NP  | NP  | NA         |
|                    | Terpene-like BGC ( <i>Sc</i> , pSCL4 cluster 7)                    |                                      | 100<br>(SMCp9)             | NP             | NP  | NP  | NA         |
|                    | Terpene-like BGC ( <i>Sp</i> , cluster 11)                         |                                      | NP                         | NP             | NP  | 100 | NA         |
|                    | Terpene-like BGC ( <i>Sp</i> , cluster 17)                         |                                      | NP                         | NP             | NP  | 100 | NA         |
| T1PKS              | Enediynes (Neocarzinostatin)                                       |                                      | Antitumor/antibiotic       | 15<br>(SMCp16) | 6   | NP  | NP         |
|                    | Enediynes (Kedarcidin)                                             | Antitumor                            | NP                         | NP             | 6   | NP  | BGC0000081 |
|                    | Herboxidiene                                                       | Antitumor                            | 8<br>(SMC21)               | 3              | 7   | NP  | BGC0001065 |
|                    | JBIR-100                                                           | Antibiotic                           | 80<br>(SMC1)               | NP             | NP  | NP  | BGC0001348 |
|                    | Lobosamide (macrolactam)                                           | Anti-trypanosomal                    | 4<br>(SMCp13)              | 6              | 10  | NP  | BGC0001303 |
|                    | Svaricin                                                           | Antifungal                           | NP                         | NP             | 6   | NP  | BGC0001382 |
| T2PKS <sup>1</sup> | Lactonamycin                                                       | Antibiotic                           | 3<br>(SCLAV_2306 – 2316)   | NP             | NP  | 3   | BGC0000238 |
|                    | Spore pigment                                                      | Protective pigment                   | 75<br>(SMC15)              | 83             | 83  | 83  | BGC0000271 |
|                    | Rabelomycin                                                        | Antimicrobial (cytotoxic)            | NP                         | NP             | 6   | NP  | BGC0000262 |

(Foot notes on following page)

- <sup>a</sup> BGCs in bold font correspond with specific SMs detected in the current study (shown in Supplementary Table 5)
- <sup>b</sup> Percent similarity of the specific BGC from each species to that of the corresponding BGC in column 2 is shown
- <sup>c</sup> The parenthesis refer to the identifiers assigned to *S. clavuligerus* BGCs by Medema et al. (2010) or locus tags from StrepDB if BGCs were not identified in that study (<http://strepdb.streptomyces.org.uk>). SM Cp: specialized metabolite cluster in plasmid pSCL4, SMC: specialized metabolite cluster in chromosome
- <sup>d</sup> MIBiG BGC-ID: Minimal information about biosynthetic gene cluster-identification number
- <sup>e</sup> NP: Not present
- <sup>f</sup> NA: Not applicable
- <sup>g</sup> pSCL4: The giant linear plasmid in *S. clavuligerus*
- <sup>h</sup> NRPS: Non-ribosomal peptide synthetase
- <sup>i</sup> PKS: Polyketide synthase
- <sup>j</sup> T1PKS: Type 1 polyketide synthase
- <sup>k</sup> RiPP: Ribosomally synthesized and post-translationally modified peptide
- <sup>l</sup> T2PKS: Type 2 polyketide synthase

**Supplementary Table S5.** Specialized metabolites (SMs) detected with high confident and/or with associated biosynthetic gene clusters in *S. clavuligerus* (*Sc*), *S. jumonjinensis* (*Sj*) and *S. katsurahamanus* (*Sk*) using MS based metabolomics and GNPS analysis.

| Name <sup>a</sup>                     | Species in which detected | Observed <i>m/z</i> [Adduct]                 | Molecular formula (weight, g/mol)                                                    | Cosine score | Shared peaks | Reference (Sc) <sup>b</sup>    |
|---------------------------------------|---------------------------|----------------------------------------------|--------------------------------------------------------------------------------------|--------------|--------------|--------------------------------|
| (-)-Carveol                           | <i>Sc, Sj, Sk</i>         | 135.117 [M -H <sub>2</sub> O+H] <sup>+</sup> | C <sub>10</sub> H <sub>16</sub> O (152.237)                                          | 0.96         | 13           | This study only                |
| <b>Desferrioxamine B</b>              | <i>Sc, Sk</i>             | 561.361 [M+H] <sup>+</sup>                   | C <sub>25</sub> H <sub>48</sub> N <sub>6</sub> O <sub>8</sub> (560.693)              | 0.96         | 49           | This study only                |
| <b>Holomycin</b>                      | <i>Sc</i>                 | 214.994 [M+H] <sup>+</sup>                   | C <sub>7</sub> H <sub>6</sub> N <sub>2</sub> O <sub>2</sub> S <sub>2</sub> (214.257) | 0.96         | 18           | (Kenig and Reading, 1979)      |
| <b>Naringenin</b>                     | <i>Sc, Sj</i>             | 271.062 [M-H] <sup>-</sup>                   | C <sub>15</sub> H <sub>12</sub> O <sub>5</sub> (272.256)                             | 0.95         | 19           | (Álvarez-Álvarez et al., 2015) |
| Cuminy alcohol                        | <i>Sc, Sj, Sk</i>         | 133.101 [M -H <sub>2</sub> O+H] <sup>+</sup> | C <sub>10</sub> H <sub>14</sub> O (150.221)                                          | 0.95         | 16           | This study only                |
| <b>Tunicamycin C</b>                  | <i>Sc</i>                 | 817.409 [M+H] <sup>+</sup>                   | C <sub>37</sub> H <sub>60</sub> N <sub>4</sub> O <sub>16</sub> (816.899)             | 0.93         | 75           | (Kenig and Reading, 1979)      |
| <b>Tunicamycin I-CH<sub>2</sub></b>   | <i>Sc</i>                 | 789.377 [M+H] <sup>+</sup>                   | C <sub>35</sub> H <sub>56</sub> N <sub>4</sub> O <sub>16</sub> (788.836)             | 0.93         | 67           | (Martínez-Burgo et al., 2019)  |
| <b>Clavulanic acid</b>                | <i>Sc, Sk</i>             | 198.039 [M-H] <sup>-</sup>                   | C <sub>8</sub> H <sub>9</sub> NO <sub>5</sub> (199.162)                              | 0.92         | 29           | (Reading and Cole, 1977)       |
| <b>Tunicamycin I-2xCH<sub>2</sub></b> | <i>Sc</i>                 | 775.361 [M+H] <sup>+</sup>                   | C <sub>34</sub> H <sub>54</sub> N <sub>4</sub> O <sub>16</sub> (774.809)             | 0.92         | 60           | (Martínez-Burgo et al., 2019)  |
| Hydroxyvalerenic acid                 | <i>Sc</i>                 | 499.307 [2M-H] <sup>-</sup>                  | C <sub>15</sub> H <sub>22</sub> O <sub>3</sub> (250.338)                             | 0.91         | 5            | This study only                |
| Arthrobactin                          | <i>Sk</i>                 | 477.256 [M+H] <sup>+</sup>                   | C <sub>20</sub> H <sub>36</sub> N <sub>4</sub> O <sub>9</sub> (476.527)              | 0.91         | 46           | This study only                |
| <b>Thiolutin</b>                      | <i>Sc</i>                 | 229.010 [M+H] <sup>+</sup>                   | C <sub>8</sub> H <sub>8</sub> N <sub>2</sub> O <sub>2</sub> S <sub>2</sub> (228.284) | 0.91         | 41           | This study only                |
| <b>Tunicamycin B</b>                  | <i>Sc</i>                 | 845.440 [M+H] <sup>+</sup>                   | C <sub>39</sub> H <sub>64</sub> N <sub>4</sub> O <sub>16</sub> (844.953)             | 0.91         | 63           | (Kenig and Reading, 1979)      |
| <b>Tunicamycin I</b>                  | <i>Sc</i>                 | 803.393 [M+H] <sup>+</sup>                   | C <sub>36</sub> H <sub>58</sub> N <sub>4</sub> O <sub>16</sub> (802.872)             | 0.91         | 83           | (Martínez-Burgo et al., 2019)  |
| <b>Desferrioxamine E</b>              | <i>Sc, Sj</i>             | 601.356 [M+H] <sup>+</sup>                   | C <sub>27</sub> H <sub>48</sub> N <sub>6</sub> O <sub>9</sub> (600.714)              | 0.89         | 37           | (Álvarez-Álvarez et al., 2017) |
| (-)-Indolactam V                      | <i>Sc</i>                 | 274.191 [M -CO+H] <sup>+</sup>               | C <sub>17</sub> H <sub>23</sub> N <sub>3</sub> O <sub>2</sub> (301.39)               | 0.89         | 45           | This study only                |
| <b>Ectoine</b>                        | <i>Sc, Sj, Sk</i>         | 143.082 [M+H] <sup>+</sup>                   | C <sub>6</sub> H <sub>10</sub> N <sub>2</sub> O <sub>2</sub> (142.158)               | 0.89         | 7            | This study only                |

|                      |    |                              |                                                                           |      |    |                           |
|----------------------|----|------------------------------|---------------------------------------------------------------------------|------|----|---------------------------|
| Pentostatin          | Sc | 135.066 [M+2H] <sup>2+</sup> | C <sub>11</sub> H <sub>16</sub> N <sub>4</sub> O <sub>4</sub> (268.273)   | 0.89 | 19 | This study only           |
| <b>Tunicamycin A</b> | Sc | 831.424 [M+H] <sup>+</sup>   | C <sub>38</sub> H <sub>62</sub> N <sub>4</sub> O <sub>16</sub> (830.926)  | 0.87 | 77 | (Kenig and Reading, 1979) |
| Cephamycin C         | Sc | 445.104 [M-H] <sup>-</sup>   | C <sub>16</sub> H <sub>22</sub> N <sub>4</sub> O <sub>9</sub> S (446.431) | 0.86 | 39 | (Nagarajan et al., 1971)  |

<sup>a</sup> Corresponding BGCs for SMs indicated in bold font were also predicted in the current study using antiSMASH (shown in Supplementary Table 4)

<sup>b</sup> Relevant references are only included for metabolites previously detected in *S. clavuligerus*, as *S. jumonjinensis* and *S. katsurahamanus* have not been subjected to such metabolomics analysis until the current study

#### References:

- Álvarez-Álvarez, R., Botas, A., Albillos, S.M., Rumbero, A., Martín, J.F., and Liras, P. (2015). Molecular genetics of naringenin biosynthesis, a typical plant secondary metabolite produced by *Streptomyces clavuligerus*. *Microb Cell Fact* 14, 178. doi: 10.1186/s12934-015-0373-7.
- Álvarez-Álvarez, R., Martínez-Burgo, Y., Rodríguez-García, A., and Liras, P. (2017). Discovering the potential of *S. clavuligerus* for bioactive compound production: cross-talk between the chromosome and the pSCL4 mega-plasmid. *BMC Genomics* 18(1), 907. doi: 10.1186/s12864-017-4289-y.
- Kenig, M., and Reading, C. (1979). Holomycin and an antibiotic (MM 19290) related to tunicamycin, metabolites of *Streptomyces clavuligerus*. *J Antibiot* (Tokyo) 32(6), 549-554.
- Martínez-Burgo, Y., Santos-Aberturas, J., Rodríguez-García, A., Barreales, E.G., Tormo, J.R., Truman, A.W., et al. (2019). Activation of Secondary Metabolite Gene Clusters in *Streptomyces clavuligerus* by the PimM Regulator of *Streptomyces natalensis*. *Front Microbiol* 10, 580. doi: 10.3389/fmicb.2019.00580.
- Nagarajan, R., Boeck, L.D., Gorman, M., Hamill, R.L., Higgs, C.E., Hoehn, M.M., et al. (1971). Beta-lactam antibiotics from *Streptomyces*. *J Am Chem Soc* 93(9), 2308-2310. doi: 10.1021/ja00738a035.
- Reading, C., and Cole, M. (1977). Clavulanic acid: a beta-lactamase-inhibiting beta-lactam from *Streptomyces clavuligerus*. *Antimicrob Agents Chemother* 11(5), 852-857. doi: 10.1128/aac.11.5.852.

**Supplementary Table S6.** Other potential specialized metabolites detected in *S. clavuligerus* (*Sc*), *S. jumonjinensis* (*Sj*) and *S. katsurahamanus* (*Sk*) using MS based metabolomics and GNPS analysis.

| Name                                            | Species in which detected | Observed <i>m/z</i> [Adduct]                                               | Molecular formula (Weight, g/mol)                                        | Cosine Score | Shared peaks |
|-------------------------------------------------|---------------------------|----------------------------------------------------------------------------|--------------------------------------------------------------------------|--------------|--------------|
| Allantoin                                       | <i>Sc, Sk</i>             | 157.036 [M-H] <sup>-</sup>                                                 | C <sub>4</sub> H <sub>6</sub> N <sub>4</sub> O <sub>3</sub> (158.117)    | 0.96         | 5            |
| Tunicamycin derivatives                         | <i>Sc</i>                 | 568.287 [M-C <sub>8</sub> H <sub>15</sub> NO <sub>6</sub> +H] <sup>+</sup> | C <sub>35</sub> H <sub>56</sub> N <sub>4</sub> O <sub>16</sub> (788.836) | 0.90         | 66           |
|                                                 |                           | 582.303 [M-C <sub>8</sub> H <sub>15</sub> NO <sub>6</sub> +H] <sup>+</sup> | C <sub>36</sub> H <sub>58</sub> N <sub>4</sub> O <sub>16</sub> (802.872) | 0.89         | 67           |
|                                                 |                           | 610.333 [M-C <sub>8</sub> H <sub>15</sub> NO <sub>6</sub> +H] <sup>+</sup> | C <sub>38</sub> H <sub>62</sub> N <sub>4</sub> O <sub>16</sub> (830.926) | 0.82         | 75           |
| (-)-Caryophyllene oxide                         | <i>Sc, Sj, Sk</i>         | 221.19 [M+H] <sup>+</sup>                                                  | C <sub>15</sub> H <sub>24</sub> O (220.356)                              | 0.89         | 31           |
| L-Saccharopine                                  | <i>Sc, Sj</i>             | 277.155 [M+H] <sup>+</sup>                                                 | C <sub>11</sub> H <sub>20</sub> N <sub>2</sub> O <sub>6</sub> (276.2863) | 0.87         | 11           |
| Dehydroxynocardamine                            | <i>Sc, Sj</i>             | 585.361 [M+H] <sup>+</sup>                                                 | C <sub>27</sub> H <sub>48</sub> N <sub>6</sub> O <sub>8</sub> (584.715)  | 0.87         | 58           |
| Isoalantolactone                                | <i>Sc</i>                 | 215.143 [M -H <sub>2</sub> O+H] <sup>+</sup>                               | C <sub>15</sub> H <sub>20</sub> O <sub>2</sub> (232.323)                 | 0.87         | 38           |
| Valerenic acid                                  | <i>Sc, Sj, Sk</i>         | 217.159 [M-H <sub>2</sub> O+H] <sup>+</sup>                                | C <sub>15</sub> H <sub>22</sub> O <sub>2</sub> (234.339)                 | 0.87         | 36           |
| Costunolide                                     | <i>Sc, Sj, Sk</i>         | 233.154 [M+H] <sup>+</sup>                                                 | C <sub>15</sub> H <sub>20</sub> O <sub>2</sub> (232.323)                 | 0.84         | 34           |
| Genipin                                         | <i>Sk</i>                 | 209.092 [M -H <sub>2</sub> O+H] <sup>+</sup>                               | C <sub>11</sub> H <sub>14</sub> O <sub>5</sub> (226.226)                 | 0.83         | 11           |
| Maesopsin                                       | <i>Sc</i>                 | 287.057 [M-H] <sup>-</sup>                                                 | C <sub>15</sub> H <sub>12</sub> O <sub>6</sub> (288.255)                 | 0.82         | 27           |
| Endothal                                        | <i>Sc, Sk</i>             | 141.055 [M -CH <sub>2</sub> O <sub>2</sub> +H] <sup>+</sup>                | C <sub>8</sub> H <sub>10</sub> O <sub>5</sub> (186.163)                  | 0.81         | 4            |
| Indolactam derivative related to lyngbyatoxin A | <i>Sc</i>                 | 424.296 [M+H] <sup>+</sup>                                                 | C <sub>26</sub> H <sub>37</sub> N <sub>3</sub> O <sub>2</sub> (423.591)  | 0.81         | 59           |
|                                                 |                           | 396.301 [M-CO+H] <sup>+</sup>                                              |                                                                          | 0.89         | 63           |
| Lyngbyatoxin A (putative)                       | <i>Sc, Sj, Sk</i>         | 438.311 [M+H] <sup>+</sup>                                                 | C <sub>27</sub> H <sub>39</sub> N <sub>3</sub> O <sub>2</sub> (437.628)  | 0.78         | 60           |
| Parthenolide                                    | <i>Sc, Sj, Sk</i>         | 249.148 [M+H] <sup>+</sup>                                                 | C <sub>15</sub> H <sub>20</sub> O <sub>3</sub> (248.317)                 | 0.76         | 34           |
| Brefeldin A                                     | <i>Sj, Sk</i>             | 245.154 [M -2H <sub>2</sub> O+H] <sup>+</sup>                              | C <sub>16</sub> H <sub>24</sub> O <sub>4</sub> (280.36)                  | 0.76         | 35           |
| Stylopine                                       | <i>Sk</i>                 | 149.06 [M -C <sub>10</sub> H <sub>9</sub> O <sub>2</sub> N+H] <sup>+</sup> | C <sub>19</sub> H <sub>17</sub> NO <sub>4</sub> (323.348)                | 0.74         | 3            |
| Cordycepin                                      | <i>Sk</i>                 | 269.124 [M+NH <sub>4</sub> ] <sup>+</sup>                                  | C <sub>10</sub> H <sub>13</sub> N <sub>5</sub> O <sub>3</sub> (251.246)  | 0.73         | 19           |
| Fumagillin                                      | <i>Sk</i>                 | 233.117 [233.1]                                                            | C <sub>26</sub> H <sub>34</sub> O <sub>7</sub> (458.551)                 | 0.72         | 22           |
| Auraptin                                        | <i>Sc</i>                 | 175.05 [M -C <sub>9</sub> H <sub>16</sub> +H] <sup>+</sup>                 | C <sub>19</sub> H <sub>22</sub> O <sub>3</sub> (298.382)                 | 0.71         | 8            |
| Imazapic                                        | <i>Sc, Sj, Sk</i>         | 258.124 [M -H <sub>2</sub> O+H] <sup>+</sup>                               | C <sub>14</sub> H <sub>17</sub> N <sub>3</sub> O <sub>3</sub> (275.308)  | 0.71         | 7            |

|                    |                   |                                                                           |                                                                         |      |    |
|--------------------|-------------------|---------------------------------------------------------------------------|-------------------------------------------------------------------------|------|----|
| Sophocarpine       | <i>Sc</i>         | 150.136 [M -C <sub>5</sub> H <sub>7</sub> ON+H] <sup>+</sup>              | C <sub>15</sub> H <sub>22</sub> N <sub>2</sub> O (246.354)              | 0.69 | 19 |
| Artemisinin        | <i>Sc, Sj, Sk</i> | 283.152 [M+H] <sup>+</sup>                                                | C <sub>15</sub> H <sub>22</sub> O <sub>5</sub> (282.336)                | 0.68 | 30 |
| Oseltamivir acid   | <i>Sc</i>         | 197.078 [M -C <sub>5</sub> H <sub>12</sub> O+H] <sup>+</sup>              | C <sub>14</sub> H <sub>24</sub> N <sub>2</sub> O <sub>4</sub> (284.356) | 0.67 | 6  |
| Tomatidine         | <i>Sj</i>         | 416.353 [M+H] <sup>+</sup>                                                | C <sub>27</sub> H <sub>45</sub> NO <sub>2</sub> (415.662)               | 0.66 | 26 |
| Strobilactone A    | <i>Sc, Sj, Sk</i> | 265.148 [M-H] <sup>-</sup>                                                | C <sub>15</sub> H <sub>22</sub> O <sub>4</sub> (266.337)                | 0.66 | 9  |
| Indole             | <i>Sk</i>         | 118.065 [M+H] <sup>+</sup>                                                | C <sub>8</sub> H <sub>7</sub> N (117.151)                               | 0.65 | 3  |
| Bisucaberin        | <i>Sc</i>         | 401.24 [M+H] <sup>+</sup>                                                 | C <sub>18</sub> H <sub>32</sub> N <sub>4</sub> O <sub>6</sub> (400.476) | 0.65 | 41 |
| Neoandrographolide | <i>Sc</i>         | 479.266 [M-H] <sup>-</sup>                                                | C <sub>26</sub> H <sub>40</sub> O <sub>8</sub> (480.598)                | 0.64 | 12 |
| Glabridin          | <i>Sk</i>         | 189.095 [M -C <sub>8</sub> H <sub>8</sub> O <sub>2</sub> +H] <sup>+</sup> | C <sub>20</sub> H <sub>20</sub> O <sub>4</sub> (324.380)                | 0.62 | 22 |
| Anemonin           | <i>Sk</i>         | 193.061 [M+H] <sup>+</sup>                                                | C <sub>10</sub> H <sub>8</sub> O <sub>4</sub> (192.171)                 | 0.61 | 13 |



**Supplementary Figure S1. Mass spectrometric (MS) detection of clavulanic acid (CA) in producing *Streptomyces* species.** MS analysis of 96-hour SA culture supernatants (as shown in Fig. 2B) from *S. jumonjinensis*, *S. katrurahamanus* and *S. clavuligerus* showing the spectra of peaks corresponding imidazole derivatized CA  $[M+H]^+$  ( $m/z = 224$ ) and the fragmented product  $[M\text{-imidazole}]^+$  ( $m/z = 156$ ), which are indicated by (\*).

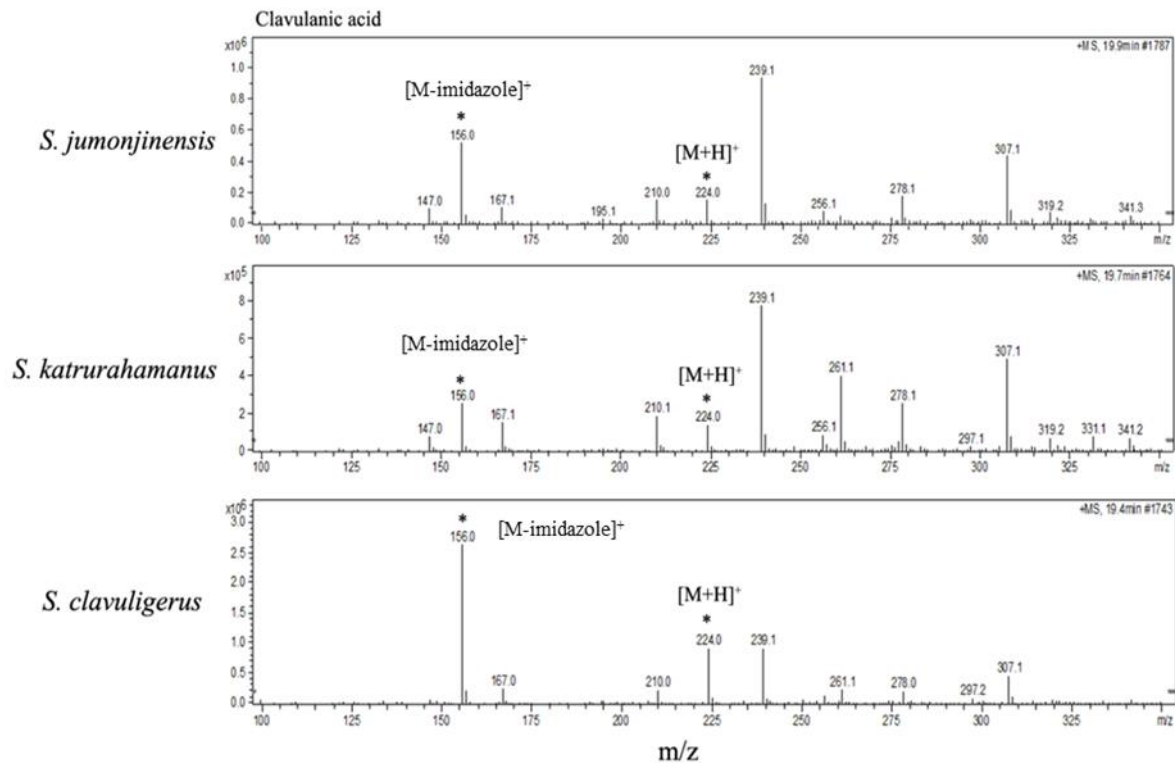



**Supplementary Figure S3. Mass spectrometric (MS) detection of clavulanic acid (CA) and 2-Hydroxymethylclavam (2-HMC) in the wt,  $\Delta nocE$  and  $ermEp^*-nocE$  strains of *S. clavuligerus*.** MS analysis of 96-hour soy culture supernatants (from Fig. 4B) showing the spectra of peaks corresponding to CA and 2-HMC. The major peaks due to imidazole derivatized CA  $[M+H]^+$  ( $m/z = 224$ ) and the fragmented product  $[M-imidazole]^+$  ( $m/z = 156$ ), and imidazole derivatized 2HMC  $[M+H]^+$  ( $m/z = 212$ ) and the fragmented product  $[M-imidazole]^+$  ( $m/z = 144$ ) are indicated by (\*).

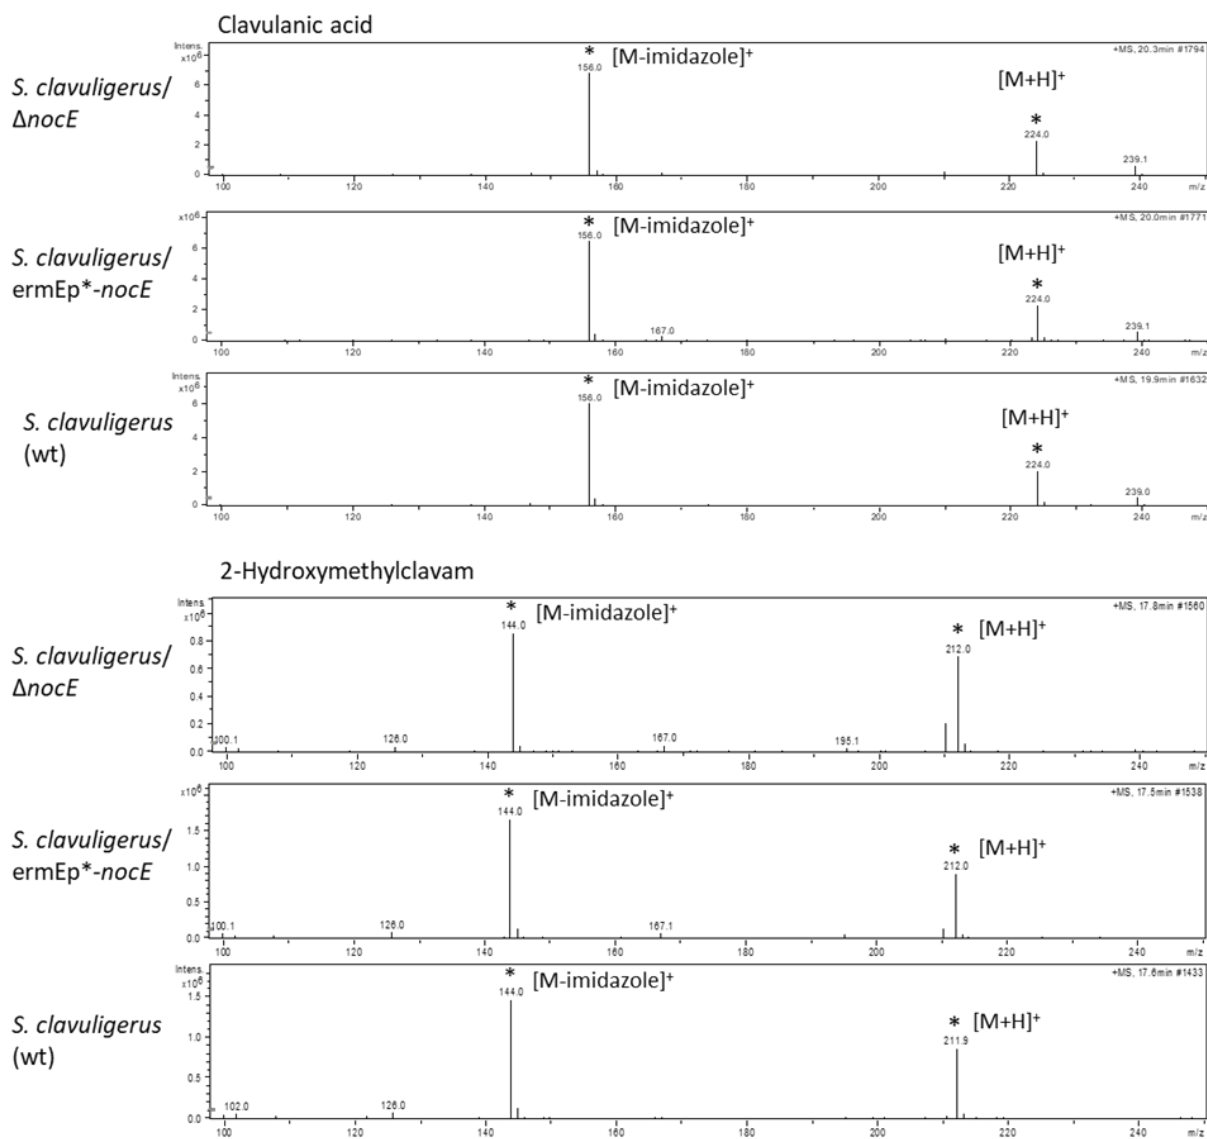

Supplement: Data_Sheet_1.pdf [file Data_Sheet_1.pdf]
